# Supplementary material for: Low-dose in vivo protection and neutralization across SARS-CoV-2 variants by monoclonal antibody combinations
Source: PubMed Central journal article supplement (PMC8642242; doi:10.1038/s41590-021-01068-z), 2021-10-29
Supplement: 41590_2021_1068_MOESM1_ESM.pdf [file 41590_2021_1068_MOESM1_ESM.pdf]

---

**Supplementary information**

---

**Low-dose in vivo protection and  
neutralization across SARS-CoV-2 variants  
by monoclonal antibody combinations**

---

In the format provided by the  
authors and unedited

**Supplementary Table 1.** WRAIR NTD and RBD mAbs comparisons with previously characterized SARS-CoV-2 mAbs.

|                             | mAb                     | VH gene | % SHM | DH gene | JH gene | CDRH3 length | CDR1       | CDR2     | VDJ junction             | VL gene | IC50 (µg/ml) | Reference       |
|-----------------------------|-------------------------|---------|-------|---------|---------|--------------|------------|----------|--------------------------|---------|--------------|-----------------|
| NTD neutralizing antibodies | WRAIR-2004              | 1-2     | 1.7   | 3-10    | 5       | 11           | GYTFTGY    | INFSSGGT | CATDGDGGENWFDPW          | VK1D-16 | 0.027        |                 |
|                             | WRAIR-2025              | 1-24    | 4.8   | 2-15    | 5       | 12           | GYTLVELS   | FDPEDGET | CVTSQPFVSPNWFDPW         | VL2-14  | 0.009        |                 |
|                             | WRAIR-2035              | 1-24    | 2.7   | 5-18    | 5       | 12           | GYTLPELS   | FDPEDGKI | CATSPAVVERGWFDPW         | VL2-8   | 0.053        |                 |
|                             | WRAIR-2039              | 1-24    | 2.4   | 4-17    | 4       | 11           | GYMLIELS   | FDPEDAET | CTTGPAVTNRPADYW          | VL1-40  | 0.006        | this manuscript |
|                             | WRAIR-2196              | 1-24    | 2.0   | 6-25    | 4       | 13           | GYTLIELS   | FDPEDAKT | CATTPAFMAAGDFDYW         | VL3-27  | 0.109        |                 |
|                             | <b>WRAIR-2008</b>       | 1-24    | 2.0   | 1-20    | 6       | 19           | GYTLTELS   | FDPEDGET | CATAGAITGTPRNFYYYYGMDVW  | VK2-24  | 0.017        |                 |
|                             | <b>WRAIR-2037</b>       | 1-24    | 1.0   | 1-20    | 6       | 19           | GYTLTELS   | FDPEDAET | CATAGAITGTPTNYSYYYYGMDFW | VK2-24  | 0.072        |                 |
|                             | <b>4A8</b>              | 1-24    | 1.4   | 6-19    | 6       | 19           | GYTLTELS   | FDPEDGET | CATSTAVAGTPDFDYGGMDVW    | VK2-24  | 0.017        | 26              |
|                             | 1-87                    | 1-24    | 1.0   | 6-19    | 6       | 19           | GYTLIELS   | FDPEDAET | CATGIAVIGPPPSTYYYYGMDVW  | VL2-14  | 0.086        | 8               |
|                             | CM25                    | 1-24    | n/a   | 3-10    | 5       | 12           | GYTLTELS   | FDPEDGET | CATGPAVRRGSWFDPW         | VL1-51  | 0.010*       | 27              |
|                             | FC05                    | 1-24    | 1.0   | 6-13    | 5       | 12           | GYTLPEVA   | FDPEDGET | CATTPFSSSYWFDPW          | VK1-17  | 0.114*       | 49              |
| RBD neutralizing antibodies | WRAIR-2123              | 3-30    | 1.7   | 3-10    | 4       | 18           | GFTFSSYA   | LSYDGSNK | CARDGVSVTMVRGVIGPLCDYW   | VK1-33  | 0.004        |                 |
|                             | WRAIR-2125              | 3-30    | 1.0   | 3-22    | 1       | 18           | GFTFSSYG   | ISYDGSNK | CAKDSPIYYDSSGYYPGYFQDW   | VK1-39  | 0.017        |                 |
|                             | WRAIR-2165              | 3-48    | 1.0   | 6-25    | 4       | 18           | GFTFSSYS   | ISSSSSTI | CARVARRDVAPATIAAYFLDYW   | VK3-11  | 0.010        | this manuscript |
|                             | WRAIR-2173              | 4-39    | 6.0   | 2-2     | 5       | 21           | GDSISSSDYS | IYYIKNT  | CARERPPFDVVVPAARPNWFDPW  | VL1-40  | 0.004        |                 |
|                             | P5A-1B6                 | 3-30    | 0.0   | -       | -       | 18           | GFTFSSYA   | ISYDGSNK | CARDGQAITMVQGVIGPPFDYW   | VK1-33  | 0.253        | 45              |
|                             | P2B-2F6                 | 4-38    | -     | -       | -       | 18           | GYSISSGY   | IYHSGST  | CARAVVGI VVVPAAGRRAFDIW  | VL2-8   | 0.050        | 12              |
|                             | CB6                     | 3-66    | 1.0   | 3-10    | 4       | 11           | GFTVSSNY   | IYSGGST  | CARVLPYGDYLDYW           | VK1-39  | 0.023        | 50              |
|                             | C002                    | 3-30    | 0.3   | 2-15    | 4       | 15           | GFTFSIYG   | ISYDGSNK | CAKEGRPSDIVVVVAFDYW      | VK1-39  | 0.008        | 29              |
|                             | CC12.1                  | 3-53    | -     | -       | 6       | 9            | GLTVSSNY   | IYSGSTF  | CARDLDVYGLDVW            | VK1-9   | 0.019        | 48              |
|                             | <b><u>S2E12</u></b>     | 1-58    | -     | -       | 3       | 14           | GFTFTSSA   | IVVSGNT  | CASPYCSGGSCSDGFDIW       | VK3-20  | 0.006*       | 16              |
|                             | <b><u>COV2-2196</u></b> | 1-58    | -     | 2-2     | 3       | 14           | GFTFMSSA   | IVIGSGNT | CAAPYCSSISCNDGFDIW       | VK3-20  | 0.001        | 4               |
|                             | <b><u>A23-58.4</u></b>  | 1-58    | 0.0   | 2-8     | 6       | 14           | GFTFTSSA   | IVVSGNT  | CAAPNCSNVVCYDGFDIW       | VK3-20  | 0.003        | 40              |
|                             | LY-CoV555               | 1-69    | 0.3   | -       | -       | 16           | GGTFSNYA   | IIPILGIA | CARGYYEARHYYYYYAMDVW     | VK1-39  | 0.012        | 43              |
|                             | REGN10933               | 3-11    | -     | -       | -       | 11           | GFTFSNYA   | ISYDGSNK | CASGSDYGDYLLVYW          | VK1D-33 | 0.006        | 41              |

Germline gene assignments and characteristics of WRAIR and previously structurally characterized mAbs were obtained with IgBlast. HCDR3 lengths are based on Kabat numbering scheme. The half inhibitory concentration (IC50) is indicated for the pseudotyped assay, when available, or the authentic virus assay (marked by an asterisk). NTD-directed 4A8-like and RBD-directed S2E12-like antibodies are bolded and underlined, respectively.

**Supplementary Table 2.** Crystallographic Data Collection and Refinement Statistics

|                                         | RBD-A<br>WRAIR-2125 +<br>SARS-CoV-2 RBD<br>(PDB: 7N4L)                                                            | RBD-A<br>WRAIR-2173 +<br>SARS-CoV-2 RBD<br>(PDB: 7N4J)  | RBD-B<br>WRAIR-2057 +<br>SARS-CoV-2 RBD<br>(PDB: 7N4I)               | RBD-C<br>WRAIR-2151 + SARS-<br>CoV-2 RBD<br>(PDB: 7N4M)    |
|-----------------------------------------|-------------------------------------------------------------------------------------------------------------------|---------------------------------------------------------|----------------------------------------------------------------------|------------------------------------------------------------|
| <b>Data collection and processing</b>   |                                                                                                                   |                                                         |                                                                      |                                                            |
| Beamline (Detector)                     | 24-ID-E (Dectris Eiger 16M PIXEL)                                                                                 | 19-ID (Q315r CCD)                                       | 24-ID-C (Dectris Eiger 16M PIXEL)                                    | 24-ID-E (Dectris Eiger 16M PIXEL)                          |
| Data processing                         | XDS                                                                                                               | HKL2000 suite                                           | HKL2000 suite                                                        | XDS                                                        |
| Search models                           | RBD <sup>39</sup> , antibody 4-18 heavy chain (PDB code: 7L2E), human V-kappa domain light chain (PDB code: 2BX5) | RBD <sup>39</sup> , Influenza mAb 6649 (PDB code: 5W6C) | RBD <sup>39</sup> , transglutaminase 2-specific mAb (PDB code: 4XD3) | RBD <sup>39</sup> , anti-EGFR mAb 059-152 (PDB code: 5XWD) |
| Space group                             | P 6 <sub>1</sub>                                                                                                  | P 2 <sub>1</sub>                                        | P 4 <sub>3</sub>                                                     | P 4 <sub>3</sub> 2 <sub>1</sub> 2                          |
| Cell dimensions                         |                                                                                                                   |                                                         |                                                                      |                                                            |
| a,b,c (Å)                               | 188.9,188.9,65.08                                                                                                 | 46.26,70.46,107.25                                      | 73.93,73.93,149.18                                                   | 112.91,112.91,239.50                                       |
| $\alpha,\beta,\gamma$ (°)               | 90.0,90.0,120.0                                                                                                   | 90.0,98.2,90.0                                          | 90.0,90.0,90.0                                                       | 90.0,90.0,90.0                                             |
| Resolution (Å)                          | 163.6-3.77 (4.27-4.0, 3.99-3.77)                                                                                  | 50.0-2.2 (2.28-2.20)                                    | 50.0-2.28 (2.46-2.28)                                                | 119.75-3.85 (4.35-4.08,4.07-3.85)                          |
| R <sub>sym</sub>                        | 20.8 (57.4, 86.3)                                                                                                 | 14.9 (50.2)                                             | 10.6 (39.2)                                                          | 17.6 (100.9, 213.6)                                        |
| I / $\sigma$ I                          | 4.05 (1.63, 0.95)                                                                                                 | 10.6 (3.6)                                              | 19.0 (3.1)                                                           | 8.98 (2.46,1.07)                                           |
| Reflections (unique/total)              | 24,288/43,744                                                                                                     | 34,103/219,115                                          | 36,098/183,662                                                       | 27,912/199,543                                             |
| Completeness (%)                        | 93.0 (97.4, 78.6)                                                                                                 | 99.2 (98.8)                                             | 99.3 (93.8)                                                          | 99.8 (100.0, 99.4)                                         |
| Redundancy                              | 1.8 (1.85, 1.63)                                                                                                  | 6.4 (5.5)                                               | 5.1 (4.1)                                                            | 7.15 (7.34, 7.18)                                          |
| CC <sub>1/2</sub>                       | 0.97 (0.67, 0.43)                                                                                                 | 0.95 (0.87)                                             | 0.99 (0.87)                                                          | 0.99 (0.80, 0.42)                                          |
| R <sub>pim</sub>                        | 19.7 (49.0, 84.2)                                                                                                 | 6.2 (23.3)                                              | 5.1 (20.2)                                                           | 8.9 (32.5, 74.8)                                           |
| <b>Refinement</b>                       |                                                                                                                   |                                                         |                                                                      |                                                            |
| Resolution (Å)                          | 20.0-3.78                                                                                                         | 44.4-2.2                                                | 19.87-2.28                                                           | 20.0-3.85                                                  |
| No. reflections                         | 11,972                                                                                                            | 33,711                                                  | 35,988                                                               | 15,274                                                     |
| R <sub>work</sub> / R <sub>free</sub> * | 0.26/0.30                                                                                                         | 0.17/0.20                                               | 0.20/0.23                                                            | 0.25/0.29                                                  |
| Ramachandran                            |                                                                                                                   |                                                         |                                                                      |                                                            |
| Favoured/allowed/outliers               | 92.0/8.0/0.0                                                                                                      | 95.0/5.0/0.0                                            | 94.0/6.0/0.0                                                         | 94.0/6.0/0.0                                               |
| B-Factor                                |                                                                                                                   |                                                         |                                                                      |                                                            |
| Protein                                 | 66.5                                                                                                              | 43.7                                                    | 53.7                                                                 | 207.3                                                      |
| R.m.s deviations                        |                                                                                                                   |                                                         |                                                                      |                                                            |
| Bond lengths (Å)                        | 0.003                                                                                                             | 0.003                                                   | 0.005                                                                | 0.004                                                      |
| Bond angles (°)                         | 0.678                                                                                                             | 0.703                                                   | 0.755                                                                | 0.651                                                      |

Values in parentheses are for the highest-resolution shells. Values up to 2 high resolution shells are presented for WRAIR-2125 and WRAIR-2151 complex data sets. \*R<sub>free</sub> was calculated using ~5% randomly selected reflections.
